# Supplementary material for: Exploration of Na7Fe4.5(P2O7)4 as a cathode material for sodium-ion batteries
Source: Royal Society of Chemistry journal article supplement (doi:10.1039/c6ta05780b), 2016-01-01
Supplement: c6ta05780b1.pdf [file c6ta05780b1.pdf]

## Supplementary information

# Exploration of $\text{Na}_7\text{Fe}_{4.5}(\text{P}_2\text{O}_7)_4$ as a cathode material for sodium-ion batteries

Yubin Niu,<sup>a,b</sup> Maowen Xu,<sup>a,b,\*</sup> Bolei Shen,<sup>a,b</sup> Chunlong Dai,<sup>a,b</sup> and Chang Ming Li<sup>a,b,c,\*</sup>

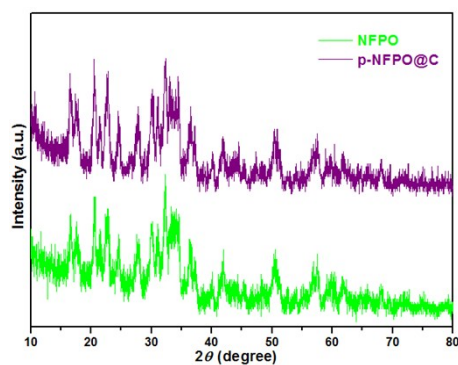

Fig. S1 XRD patterns of NFPO and p-NFPO@C, respectively.

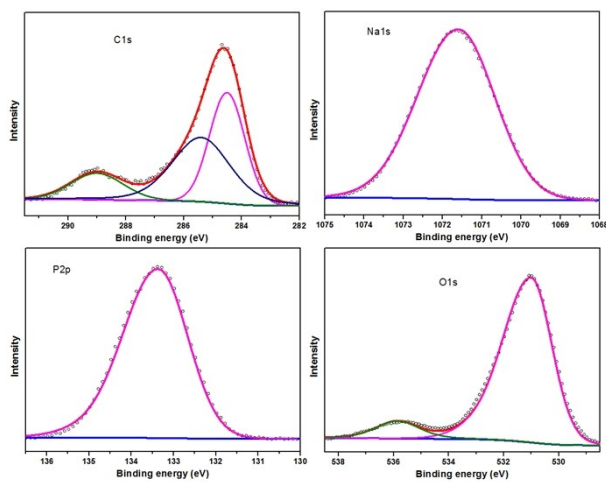

Fig. S2 XPS narrow spectra of the C 1s, Na 1s, P 2p and O 1s in p-NFPO@C composite, respectively.

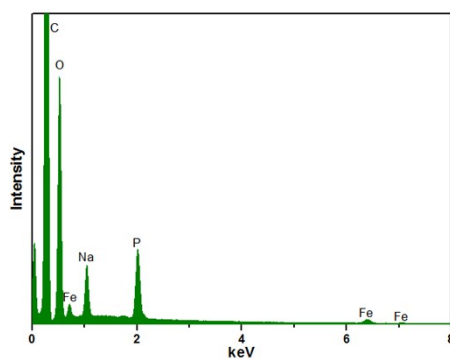

Fig. S3 The corresponding element composition diagram of p-NFPO@C.

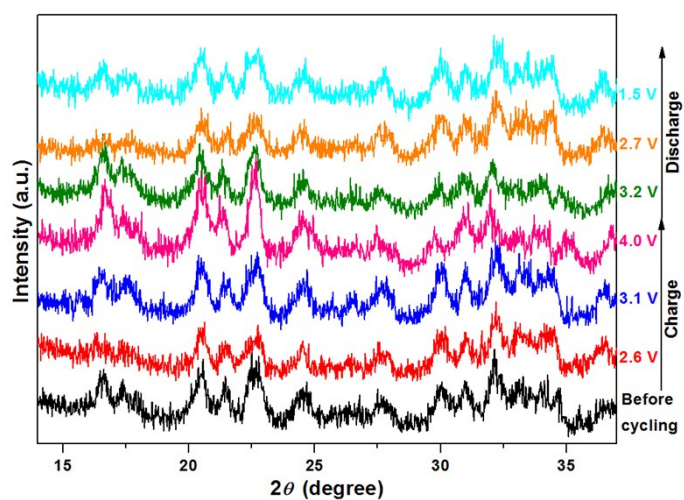

Fig. S4 Ex-situ XRD patterns of p-NFPO@C electrode at different states of charge and discharge, respectively.

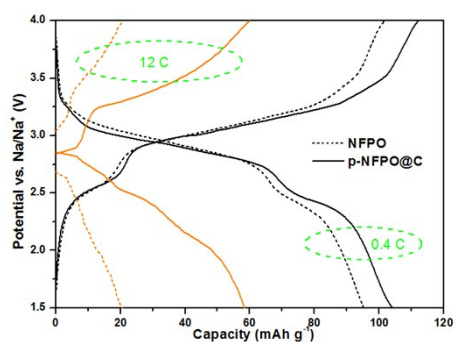

Fig. S5 Charge and discharge curves at 0.4 and 12 C of NFPO and p-NFPO@C, respectively.

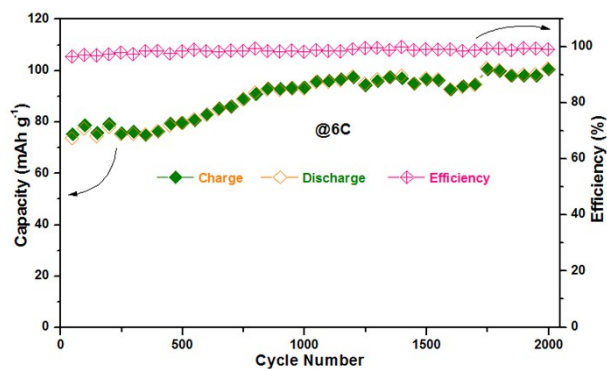

Fig. S6 Cycling performance and Coulombic efficiency of Na/p-NFPO@C cells at 6 C (648 mA g<sup>-1</sup>).

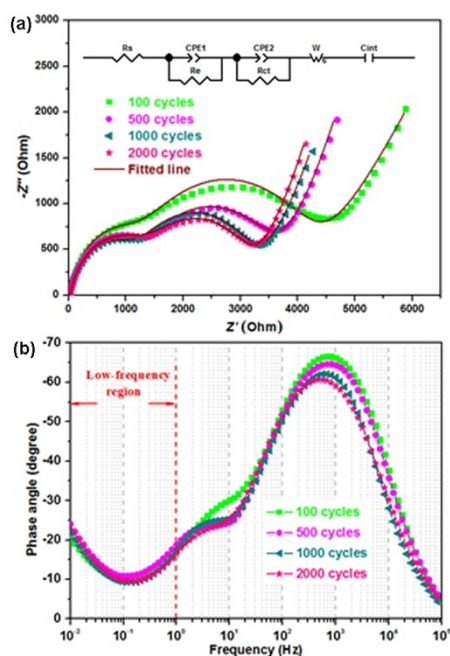

Fig. S7 Nyquist (a) and the corresponding Bode plots (b) of different cycles at 6 C in Na/p-NFPO@C cells. (Inset shows the equivalent circuit corresponding to the Nyquist plots.)

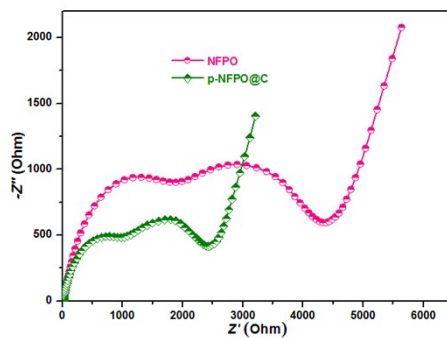

Fig. S8 EIS analysis of NFPO and p-NFPO@C at 6 C after 2000 cycles.

Table S1. Impedance parameters calculated from equivalent circuit.

| Cycle              | $R_s$ (Ohm) | $R_e$ (Ohm) | $R_{ct}$ (Ohm) |
|--------------------|-------------|-------------|----------------|
| 100 <sup>th</sup>  | 12.3        | 839.8       | 2221           |
| 500 <sup>th</sup>  | 12.6        | 945.3       | 1603           |
| 1000 <sup>th</sup> | 17.45       | 846.7       | 1481           |
| 2000 <sup>th</sup> | 16.62       | 1006        | 1258           |
